# Supplementary material for: Toxicity Weighting for Human Biomonitoring Mixture Risk Assessment: A Proof of Concept
Source: Toxics. 2023 Apr 26;11(5):408. doi: 10.3390/toxics11050408 (PMC10223739; doi:10.3390/toxics11050408)
Supplement: Supplementary file 1 [file toxics-11-00408-s001.zip › toxics-2262271-Table S3.xlsx]

## Sheet: Table_S3
Type	Priority substance group	Biomarker - CAS	Biomarker- acronym	Biomarker - name	HBHBGV_Type	HBHBGV_Value	HBHBGV_unit	HBHBGV_Matrix	Study Population_ages	Study Population_description	HBGV_comment	BGV_origin	BGV_year	Parent compound - CAS	Parent compound - name	Parent compound - acronym	Reference source (references in EndNote database on project share for inclusion as numbered reference list)
Environmental	Acrylamide	81690-92-8	AAMA	N-acetyl-S-(2-carbamoylethyl)cysteine	BE	13	µg/L	urine		not specified	based on RfD	US EPA	1991	79-06-1	acrylamide	AA	Hays and Aylward (2008). Biomonitoring equivalents (BE) dossier for acrylamide (AA)(CAS No. 79-06-1). Regulatory Toxicology and Pharmacology, 51, S57-S67.
Environmental	Acrylamide	81690-92-8	AAMA	N-acetyl-S-(2-carbamoylethyl)cysteine	BE	16	µg/g creatinine	urine		not specified	based on chronic RfD	US EPA	1991	79-06-1	acrylamide	AA	Hays and Aylward (2008). Biomonitoring equivalents (BE) dossier for acrylamide (AA)(CAS No. 79-06-1). Regulatory Toxicology and Pharmacology, 51, S57-S67.
Environmental	Acrylamide	81690-92-8	AAMA	N-acetyl-S-(2-carbamoylethyl)cysteine	BE	0.1	µg/L	urine	not specified		based on OSF	US EPA	1993	79-06-1	acrylamide	AA	Hays SM, Aylward LL. 2008. Biomonitoring equivalents (BE) dossier for acrylamide (AA)(CAS No. 79-06-1). Regulatory Toxicology and Pharmacology, 51, S57-S67.
Environmental	Acrylamide	81690-92-8	AAMA	N-acetyl-S-(2-carbamoylethyl)cysteine	BE	0.2	µg/g creatinine	urine	not specified		based on OSF	US EPA	1993	79-06-1	acrylamide	AA	Hays SM, Aylward LL. 2008. Biomonitoring equivalents (BE) dossier for acrylamide (AA)(CAS No. 79-06-1). Regulatory Toxicology and Pharmacology, 51, S57-S67.
Environmental	Bisphenols	80-05-7	BPA	bisphenol A	HBM-I	100	µg/L	urine		children		HBM Commission	2015	80-05-7	bisphenol A	BPA	Apel et al. (2017). New HBM values for emerging substances, inventory of reference and HBM values in force, and working principles of the German Human Biomonitoring Commission. International Journal of Hyg and Env Health.
Environmental	Bisphenols	80-05-7	BPA	bisphenol A	HBM-I	200	µg/L	urine		adults		HBM Commission	2015	80-05-7	bisphenol A	BPA	Apel et al. (2017). New HBM values for emerging substances, inventory of reference and HBM values in force, and working principles of the German Human Biomonitoring Commission. International Journal of Hyg and Env Health.
Environmental	Bisphenols	80-05-7	BPA	bisphenol A	BE	2000	µg/L	urine	6 and up		based on RfD	US EPA	1993	80-05-7	bisphenol A	BPA	Krishnan et al. (2010). Biomonitoring equivalents for bisphenol A (BPA). Regulatory Toxicology and Pharmacology, 58, 18-24.
Environmental	Bisphenols	80-05-7	BPA	bisphenol A	BE	1000	µg/L	urine	6 and up		based on provisional TDI	Health Canada	2008	80-05-7	bisphenol A	BPA	Krishnan et al. (2010). Biomonitoring equivalents for bisphenol A (BPA). Regulatory Toxicology and Pharmacology, 58, 18-24.
Environmental	Bisphenols	80-05-7	BPA	bisphenol A	BE	2000	µg/L	urine	6 and up		based on provisional TDI	EFSA	2006	80-05-7	bisphenol A	BPA	Krishnan et al. (2010). Biomonitoring equivalents for bisphenol A (BPA). Regulatory Toxicology and Pharmacology, 58, 18-24.
Environmental	Bisphenols	80-05-7	BPA	bisphenol A	BE	1300	µg/g creatinine	urine	6 and up		based on provisional TDI	Health Canada	2008	80-05-7	bisphenol A	BPA	Krishnan et al. (2010). Biomonitoring equivalents for bisphenol A (BPA). Regulatory Toxicology and Pharmacology, 58, 18-24.
Environmental	Bisphenols	80-05-7	BPA	bisphenol A	BE	2600	µg/g creatinine	urine	6 and up		based on RfD	US EPA	1993	80-05-7	bisphenol A	BPA	Krishnan et al. (2010). Biomonitoring equivalents for bisphenol A (BPA). Regulatory Toxicology and Pharmacology, 58, 18-24.
Environmental	Bisphenols	80-05-7	BPA	bisphenol A	BE	2600	µg/g creatinine	urine	6 and up		based on provisional TDI	EFSA	2006	80-05-7	bisphenol A	BPA	Krishnan et al. (2010). Biomonitoring equivalents for bisphenol A (BPA). Regulatory Toxicology and Pharmacology, 58, 18-24.
Environmental	Bisphenols	80-05-7	BPA	bisphenol A	HBM-GV(GenPop)	135	µg/L	urine				HBM Commission	2023	7440-43-9	cadmium	Cd	Apel, P.; Lamkarkach, F.; Lange, R.; Sissoko, F.; David, M.; Rousselle, C.; Schoeters, G.; Kolossa-Gehring, M. Human Biomonitoring Guidance Values (HBM-GVs) for Priority Substances under the HBM4EU Initiative – New Values Derivation for Deltamethrin and Cyfluthrin and Overall Results. International Journal of Hygiene and Environmental Health 2023, 248, 114097, doi:10.1016/j.ijheh.2022.114097
Environmental	Bisphenols	80-05-7	NMP	N-methyl-2-pyrrolidone (sum 5-HNMP+2-HMSI)	HBM-GV(GenPop)	10000	µg/L	urine				HBM Commission	2023	7440-43-9	cadmium	Cd	Apel, P.; Lamkarkach, F.; Lange, R.; Sissoko, F.; David, M.; Rousselle, C.; Schoeters, G.; Kolossa-Gehring, M. Human Biomonitoring Guidance Values (HBM-GVs) for Priority Substances under the HBM4EU Initiative – New Values Derivation for Deltamethrin and Cyfluthrin and Overall Results. International Journal of Hygiene and Environmental Health 2023, 248, 114097, doi:10.1016/j.ijheh.2022.114097
Environmental	Heavy metals	7440-43-9	Cd	cadmium	HBM-I	1	µg/L	urine		adults		HBM Commission	2011	7440-43-9	cadmium	Cd	Apel et al. (2017). New HBM values for emerging substances, inventory of reference and HBM values in force, and working principles of the German Human Biomonitoring Commission. International Journal of Hyg and Env Health.
Environmental	Heavy metals	7440-43-9	Cd	cadmium	HBM-II	2	µg/L	urine		children and adolescents		HBM Commission	2011	7440-43-9	cadmium	Cd	Apel et al. (2017). New HBM values for emerging substances, inventory of reference and HBM values in force, and working principles of the German Human Biomonitoring Commission. International Journal of Hyg and Env Health.
Environmental	Heavy metals	7440-43-9	Cd	cadmium	HBM-II	4	µg/L	urine		adults		HBM Commission	2011	7440-43-9	cadmium	Cd	Apel et al. (2017). New HBM values for emerging substances, inventory of reference and HBM values in force, and working principles of the German Human Biomonitoring Commission. International Journal of Hyg and Env Health.
Environmental	Heavy metals	7440-43-9	Cd	cadmium	HBM-I	0.5	µg/L	urine		children and adolescents		HBM Commission	2011	7440-43-9	cadmium	Cd	Apel et al. (2017). New HBM values for emerging substances, inventory of reference and HBM values in force, and working principles of the German Human Biomonitoring Commission. International Journal of Hyg and Env Health.
Environmental	Heavy metals	7440-43-9	Cd	cadmium	BE	1.5	µg/L	urine		not specified	based on RfD	US EPA	1994	7440-43-9	cadmium	Cd	Hays et al. (2008). Biomonitoring equivalents (BE) dossier for cadmium (Cd)(CAS No. 7440-43-9). Regulatory Toxicology and Pharmacology, 51, S49-S56.
Environmental	Heavy metals	7440-43-9	Cd	cadmium	BE	1.2	µg/L	urine		not specified	based on MRL	ATSDR	1999	7440-43-9	cadmium	Cd	Hays et al. (2008). Biomonitoring equivalents (BE) dossier for cadmium (Cd)(CAS No. 7440-43-9). Regulatory Toxicology and Pharmacology, 51, S49-S56.
Environmental	Heavy metals	7440-43-9	Cd	cadmium	BE	1.7	µg/g creatinine	urine		not specified	based on MRL	ATSDR	1999	7440-43-9	cadmium	Cd	Hays et al. (2008). Biomonitoring equivalents (BE) dossier for cadmium (Cd)(CAS No. 7440-43-9). Regulatory Toxicology and Pharmacology, 51, S49-S56.
Environmental	Heavy metals	7440-43-9	Cd	cadmium	BE	2	µg/g creatinine	urine		not specified	based on RfD	US EPA	1994	7440-43-9	cadmium	Cd	Hays et al. (2008). Biomonitoring equivalents (BE) dossier for cadmium (Cd)(CAS No. 7440-43-9). Regulatory Toxicology and Pharmacology, 51, S49-S56.
Environmental	Heavy metals	7440-43-9	Cd	cadmium	HBM-GV(GenPop)	1	µg/g creatinine	urine	> 50 years	adults over 50 years		HBM Commission	2020	7440-43-9	cadmium	Cd	Lamkarkach et al. (2021). Human biomonitoring initiative (HBM4EU): HBMBVs derived for cadmium and its compounds
Environmental	Heavy metals	7440-43-9	Cd	cadmium	HBM-GV(GenPop)	0.1	µg/g creatinine	urine	<10 years	children 10 years and younger		HBM Commission	2023	7440-43-9	cadmium	Cd	Apel, P.; Lamkarkach, F.; Lange, R.; Sissoko, F.; David, M.; Rousselle, C.; Schoeters, G.; Kolossa-Gehring, M. Human Biomonitoring Guidance Values (HBM-GVs) for Priority Substances under the HBM4EU Initiative – New Values Derivation for Deltamethrin and Cyfluthrin and Overall Results. International Journal of Hygiene and Environmental Health 2023, 248, 114097, doi:10.1016/j.ijheh.2022.114097
Environmental	Heavy metals	7440-43-9	Cd	cadmium	HBM-GV(GenPop)	0.2	µg/g creatinine	urine	11-20 years	children and adolescents		HBM Commission	2023	7440-43-9	cadmium	Cd	Apel, P.; Lamkarkach, F.; Lange, R.; Sissoko, F.; David, M.; Rousselle, C.; Schoeters, G.; Kolossa-Gehring, M. Human Biomonitoring Guidance Values (HBM-GVs) for Priority Substances under the HBM4EU Initiative – New Values Derivation for Deltamethrin and Cyfluthrin and Overall Results. International Journal of Hygiene and Environmental Health 2023, 248, 114097, doi:10.1016/j.ijheh.2022.114097
Occupational	Heavy metals	7440-47-3	Cr (total)	chromium (total)	BLV	0.54	µg/g creatinine	urine		working population	BLV based on exposure to the 8-hour OEL (1 µg.m-3 ): 2.5 µg.L-1 (1.8 µg.g-1 of creatinine) (end of week) This value only applies to exposures to CrVI in the chrome-plating sector.	France	2007	18540-29-9	Chromium(VI)	Cr(VI)	ANSES (French Agency for Food, Environmental and Occupational Health & Safety (2015) Collective expert appraisal: summary of discussion with conclusions Regarding the expert appraisal for recommending occupational exposure limits for chemical agents
Occupational	Heavy metals	7440-47-3	Cr (total)	chromium (total)	BMGV	10	μmol/mol creatinine	urine		working population	and its water-soluble compounds	HSE UK	2020	7440-47-3	Chromium	Cr	EH40/2005 Workplace exposure limits. (2020) Containing the list of workplace exposure limits for use with the Control of Substances Hazardous to Health Regulations 2002 (as amended).
Occupational	Heavy metals	7440-47-3	Cr (total)	chromium (total)	BEI	25	µg/L	urine		working population	water soluble fume	ACGIH		7440-47-3	Chromium	Cr(VI)	Campo et al. (2020). Biological Monitoring of Occupational Exposure to Metals in Electric Steel Foundry Workers and Its Contribution to 8-Oxo-7,8-Dihydro-2'-Deoxyguanosine Levels. International journal of environmental research and public health, 17(6), 1811. https://doi.org/10.3390/ijerph17061811
Occupational	Heavy metals	7440-47-3	Cr (total)	chromium (total)	BEI	10	µg/L	urine		working population	water soluble fume	US ACGIH		7440-47-3	Chromium	Cr(VI)	Campo et al. (2020). Biological Monitoring of Occupational Exposure to Metals in Electric Steel Foundry Workers and Its Contribution to 8-Oxo-7,8-Dihydro-2'-Deoxyguanosine Levels. International journal of environmental research and public health, 17(6), 1811. https://doi.org/10.3390/ijerph17061811
Occupational	Heavy metals	7440-47-3	Cr (total)	chromium (total)	BEI	25	µg/L	urine		working population	water-soluble fume	New Zealand		18540-29-9	Chromium(VI)	Cr(VI)	Worksafe New Zealand (WorkSafe) (2020) Workplace Exposure Standards and Biological Exposure Indices. EDITION 12-1
Occupational	Heavy metals	7440-47-3	Cr (total)	chromium (total)	BEI	10	µg/L (Increase of)	urine		working population	water-soluble fume	New Zealand		18540-29-9	Chromium(VI)	Cr(VI)	Worksafe New Zealand (WorkSafe) (2020) Workplace Exposure Standards and Biological Exposure Indices. EDITION 12-1
Environmental	Heavy metals	7439-97-6	Hg	mercury	HBM-I	7	µg/L	urine		children and adults		HBM Commission	1999	7439-97-6	mercury	Hg	Apel et al. (2017). New HBM values for emerging substances, inventory of reference and HBM values in force, and working principles of the German Human Biomonitoring Commission. International Journal of Hyg and Env Health.
Environmental	Heavy metals	7439-97-6	Hg	mercury	HBM-I	5	µg/g creatinine	urine		children and adults		HBM Commission	1999	7439-97-6	mercury	Hg	Apel et al. (2017). New HBM values for emerging substances, inventory of reference and HBM values in force, and working principles of the German Human Biomonitoring Commission. International Journal of Hyg and Env Health.
Environmental	Heavy metals	7439-97-6	Hg	mercury	HBM-II	20	µg/g creatinine	urine		children and adults		HBM Commission	1999	7439-97-6	mercury	Hg	Apel et al. (2017). New HBM values for emerging substances, inventory of reference and HBM values in force, and working principles of the German Human Biomonitoring Commission. International Journal of Hyg and Env Health.
Environmental	Heavy metals	7439-97-6	Hg	mercury	HBM-II	25	µg/L	urine		children and adults		HBM Commission	1999	7439-97-6	mercury	Hg	Apel et al. (2017). New HBM values for emerging substances, inventory of reference and HBM values in force, and working principles of the German Human Biomonitoring Commission. International Journal of Hyg and Env Health.
Environmental	Metalloids	7440-38-2	As(total)	arsenic (total) from (iAs + MMA + DMA)	BE	120.9	µg/L	urine	6 and up	general population	based on acute MRL	ATSDR	2007	7440-38-2	arsenic	As	Hays et al. (2010). Biomonitoring equivalents for inorganic arsenic. Regulatory Toxicology and Pharmacology, 58, 1-9.
Environmental	Metalloids	7440-38-2	As(total)	arsenic (total) from (iAs + MMA + DMA)	BE	6.4	µg/L	urine	6 and up	general population	based on RfD	US EPA	1993	7440-38-2	arsenic	As	Hays et al. (2010). Biomonitoring equivalents for inorganic arsenic. Regulatory Toxicology and Pharmacology, 58, 1-9.
Environmental	Metalloids	7440-38-2	As(total)	arsenic (total) from (iAs + MMA + DMA)	BE	8.3	µg/g creatinine	urine	6 and up	general population	based on RfD	US EPA	1993	7440-38-2	arsenic	As	Hays et al. (2010). Biomonitoring equivalents for inorganic arsenic. Regulatory Toxicology and Pharmacology, 58, 1-9.
Environmental	Metalloids	7440-38-2	As(total)	arsenic (total) from (iAs + MMA + DMA)	BE	8.3	µg/g creatinine	urine	6 and up	general population	based on chronic MRL	ATSDR	2007	7440-38-2	arsenic	As	Hays et al. (2010). Biomonitoring equivalents for inorganic arsenic. Regulatory Toxicology and Pharmacology, 58, 1-9.
Environmental	Metalloids	7440-38-2	As(total)	arsenic (total) from (iAs + MMA + DMA)	BE	1.7	µg/g creatinine	urine	6 and up	general population	based on MAC	Health Canada	2006	7440-38-2	arsenic	As	Hays et al. (2010). Biomonitoring equivalents for inorganic arsenic. Regulatory Toxicology and Pharmacology, 58, 1-9.
Environmental	Metalloids	7440-38-2	As(total)	arsenic (total) from (iAs + MMA + DMA)	BE	1.4	µg/L	urine	6 and up	general population	based on MAC	Health Canada	2008	7440-38-2	arsenic	As	Hays et al. (2010). Biomonitoring equivalents for inorganic arsenic. Regulatory Toxicology and Pharmacology, 58, 1-9.
Environmental	Metalloids	7440-38-2	As(total)	arsenic (total) from (iAs + MMA + DMA)	BE	6.4	µg/L	urine	6 and up	general population	based on chronic MRL	ATSDR	2007	7440-38-2	arsenic	As	Hays et al. (2010). Biomonitoring equivalents for inorganic arsenic. Regulatory Toxicology and Pharmacology, 58, 1-9.
Environmental	Metalloids	7440-38-2	As(total)	arsenic (total) from (iAs + MMA + DMA)	BE	155.6	µg/g creatinine	urine	6 and up	general population	based on acute MRL	ATSDR	2007	7440-38-2	arsenic	As	Hays et al. (2010). Biomonitoring equivalents for inorganic arsenic. Regulatory Toxicology and Pharmacology, 58, 1-9.
Environmental	Non-metals	7782-49-2	Se	selenium	BE	230	µg/L	plasma		not specified		IOM US/Canada	2000	7782-49-2	selenium	Se	Hays et al. (2014). Biomonitoring equivalents for selenium. Regulatory Toxicology and Pharmacology, 70, 333-339.
Environmental	Non-metals	7782-49-2	Se	selenium	BE	90	µg/L	urine		not specified	based on RfD	US EPA	1991	7782-49-2	selenium	Se	Hays et al. (2014). Biomonitoring equivalents for selenium. Regulatory Toxicology and Pharmacology, 70, 333-339.
Environmental	Non-metals	7782-49-2	Se	selenium	BE	90	µg/L	urine		not specified	based on chronic MRL	ATSDR	2003	7782-49-2	selenium	Se	Hays et al. (2014). Biomonitoring equivalents for selenium. Regulatory Toxicology and Pharmacology, 70, 333-339.
Environmental	Non-metals	7782-49-2	Se	selenium	BE	180	µg/L	plasma		not specified	based on RfD	US EPA	1991	7782-49-2	selenium	Se	Hays et al. (2014). Biomonitoring equivalents for selenium. Regulatory Toxicology and Pharmacology, 70, 333-339.
Environmental	Non-metals	7782-49-2	Se	selenium	BE	180	µg/L	plasma		not specified	based on chronic MRL	ATSDR	2003	7782-49-2	selenium	Se	Hays et al. (2014). Biomonitoring equivalents for selenium. Regulatory Toxicology and Pharmacology, 70, 333-339.
Environmental	Non-metals	7782-49-2	Se	selenium	BE	110	µg/L	urine		not specified	based on UDL	IOM US/Canada	2000	7782-49-2	selenium	Se	Hays et al. (2014). Biomonitoring equivalents for selenium. Regulatory Toxicology and Pharmacology, 70, 333-339.
Occupational	PAHs	5315-79-7	1-PYR	1-hydroxypyrene	BMGV	4	μmol/mol creatinine	urine		working population	post shift	HSE UK	2005	PAHs	Polycyclic aromatic hydrocarbons	PAHs	EH40/2005 Workplace exposure limits. (2020) Containing the list of workplace exposure limits for use with the Control of Substances Hazardous to Health Regulations 2002 (as amended).
Environmental	Phthalate substitutes	∑ OH-MINCH, cx-MINCH	∑ Cyclohexane-1,2-dicarboxylate-mono-(7-hydroxy-4-methyl)octyl ester, cyclohexan-1,2-dicarboxylat-mono-(7-carboxylat-4-methyl)heptylester	∑ OH-MINCH, cx-MINCH	HBM-I	3	mg/L	urine		children		HBM Commission	2014	166412-78-8	di(isononyl)cyclohexane-1,2-dicarboxylate	DINCH	Apel et al. (2017). New HBM values for emerging substances, inventory of reference and HBM values in force, and working principles of the German Human Biomonitoring Commission. International Journal of Hyg and Env Health.	https://doi.org/10.1016/j.ijheh.2016.09.007	1	DINCH / ∑ OH-MINCH, cx-MINCH
Environmental	Phthalates	∑ 40321-99-1, 40809-41-4	∑ mono-(2-ethyl-5-hydroxyhexyl)phthalat, mono-(2-ethyl-5-carboxypentyl)phthalate	∑ 5OH-MEHP, 5cx-MEPP	HBM-GV(GenPop)	380	µg/L	urine	includes 6 to 13	children included	based on Tolerable Daily Intake (TDI)	HBM4EU	2017	117-81-7	di-(2-ethylhexyl) phthalate	DEHP	Apel and Ougier (2017). HBM4EU first substance-group specific derivation of EU-wide health-based guidance values: Deliverable report D 5.2. Available: https://www.hbm4eu.eu/wp-content/uploads/2017/03/HBM4EU_D5.2_1st-substance-group-specific-derivation-of-	https://www.hbm4eu.eu/wp-content/uploads/2017/03/H	1	DEHP / ∑ 5OH-MEHP, 5cx-MEPP
Environmental	Phthalates	5cx-MEPTP	5cx-MEPTP	mono(2-ethyl-5-carboxypentyl) terephthalate	HBM-I	2800	µg/L	urine		adults		HBM Commission	2020	6422-86-2	di(2-ethylhexyl) terephthalate	DEHTP	Apel et al. (2017). New HBM values for emerging substances, inventory of reference and HBM values in force, and working principles of the German Human Biomonitoring Commission. International Journal of Hyg and Env Health.
Environmental	Phthalates	5cx-MEPTP	5cx-MEPTP	mono(2-ethyl-5-carboxypentyl) terephthalate	HBM-I	1800	µg/L	urine		children		HBM Commission	2020	6422-86-2	di(2-ethylhexyl) terephthalate	DEHTP	Apel et al. (2017). New HBM values for emerging substances, inventory of reference and HBM values in force, and working principles of the German Human Biomonitoring Commission. International Journal of Hyg and Env Health.
Environmental	Phthalates	40321-99-1	5OH-MEHP (MEHHP)	mono(2-ethyl-5-hydroxyhexyl) phthalate	BE	294.1	µg/L	urine		adults	based on TDI	HBM4EU	2017	--			Apel P, Ougier E. 2017. HBM4EU first substance-group specific derivation of EU-wide health-based guidance values: Deliverable report D 5.2. Available: https://www.hbm4eu.eu/wp-content/uploads/2017/03/HBM4EU_D5.2_1st-substance-group-specific-derivation-of-EU-wide-health-based-guidance-values.pdf
Environmental	Phthalates	40321-98-0	5oxo-MEHP (MEOHP)	Mono(2-ethyl-5-oxo-hexyl) phthalate	BE	211.3	µg/L	urine		adults	based on TDI	HBM4EU	2017	--			Apel P, Ougier E. 2017. HBM4EU first substance-group specific derivation of EU-wide health-based guidance values: Deliverable report D 5.2. Available: https://www.hbm4eu.eu/wp-content/uploads/2017/03/HBM4EU_D5.2_1st-substance-group-specific-derivation-of-
Environmental	Phthalates	936022-02-5	cx-MiNP (MCOP) (MCiOP)	mono(carboxyisooctyl) phthalate	BE	1200	µg/g creatinine	urine	6 and up		based on provisional TDI	Health Canada	1998	28553-12-0	di-iso-nonyl phthalate	DiNP	Hays et al. (2011). Biomonitoring equivalents for di-isononyl phthalate (DiNP). Regulatory Toxicology and Pharmacology, 60, 181-188.
Environmental	Phthalates	936022-02-5	cx-MiNP (MCOP) (MCiOP)	mono(carboxyisooctyl) phthalate	BE	500	µg/g creatinine	urine	6 and up		based on ADI	US CPSC	2001	28553-12-0	di-iso-nonyl phthalate	DiNP	Hays et al. (2011). Biomonitoring equivalents for di-isononyl phthalate (DiNP). Regulatory Toxicology and Pharmacology, 60, 181-188.
Environmental	Phthalates	936022-02-5	cx-MiNP (MCOP) (MCiOP)	mono(carboxyisooctyl) phthalate	BE	630	µg/g creatinine	urine	6 and up		based on provisional TDI	EFSA	2005	28553-12-0	di-iso-nonyl phthalate	DiNP	Hays et al. (2011). Biomonitoring equivalents for di-isononyl phthalate (DiNP). Regulatory Toxicology and Pharmacology, 60, 181-188.
Environmental	Phthalates	936022-02-5	cx-MiNP (MCOP) (MCiOP)	mono(carboxyisooctyl) phthalate	BE	950	µg/L	urine	6 and up		based on provisional TDI	Health Canada	1998	28553-12-0	di-iso-nonyl phthalate	DiNP	Hays et al. (2011). Biomonitoring equivalents for di-isononyl phthalate (DiNP). Regulatory Toxicology and Pharmacology, 60, 181-188.
Environmental	Phthalates	936022-02-5	cx-MiNP (MCOP) (MCiOP)	mono(carboxyisooctyl) phthalate	BE	390	µg/L	urine	6 and up		based on ADI	US CPSC	2001	28553-12-0	di-iso-nonyl phthalate	DiNP	Hays et al. (2011). Biomonitoring equivalents for di-isononyl phthalate (DiNP). Regulatory Toxicology and Pharmacology, 60, 181-188.
Environmental	Phthalates	936022-02-5	cx-MiNP (MCOP) (MCiOP)	mono(carboxyisooctyl) phthalate	BE	490	µg/L	urine	6 and up		based on provisional TDI	EFSA	2005	28553-12-0	di-iso-nonyl phthalate	DiNP	Hays et al. (2011). Biomonitoring equivalents for di-isononyl phthalate (DiNP). Regulatory Toxicology and Pharmacology, 60, 181-188.
Environmental	Phthalates	2528-16-7	MBzP	monobenzyl phthalate	BE	3800	µg/L	urine	6 and up		based on RfD	US EPA	1993	85-68-7	benzylbutyl phthalate	BzBP	Aylward et al. (2009). Derivation of biomonitoring equivalents for di-n-butyl phthalate (DBP), benzylbutyl phthalate (BzBP), and diethyl phthalate (DEP). Regulatory Toxicology and Pharmacology, 55, 259-267.
Environmental	Phthalates	2528-16-7	MBzP	monobenzyl phthalate	BE	12000	µg/L	urine	6 and up		based on provisional TDI	EFSA	2005	85-68-7	benzylbutyl phthalate	BzBP	Aylward et al. (2009). Derivation of biomonitoring equivalents for di-n-butyl phthalate (DBP), benzylbutyl phthalate (BzBP), and diethyl phthalate (DEP). Regulatory Toxicology and Pharmacology, 55, 259-267.
Environmental	Phthalates	2528-16-7	MBzP	monobenzyl phthalate	BE	40000	µg/g creatinine	urine	6 and up		based on provisional TDI	Health Canada	2000	85-68-7	benzylbutyl phthalate	BzBP	Aylward et al. (2009). Derivation of biomonitoring equivalents for di-n-butyl phthalate (DBP), benzylbutyl phthalate (BzBP), and diethyl phthalate (DEP). Regulatory Toxicology and Pharmacology, 55, 259-267.
Environmental	Phthalates	2528-16-7	MBzP	monobenzyl phthalate	BE	15000	µg/g creatinine	urine	6 and up		based on provisional TDI	EFSA	2005	85-68-7	benzylbutyl phthalate	BzBP	Aylward et al. (2009). Derivation of biomonitoring equivalents for di-n-butyl phthalate (DBP), benzylbutyl phthalate (BzBP), and diethyl phthalate (DEP). Regulatory Toxicology and Pharmacology, 55, 259-267.
Environmental	Phthalates	2528-16-7	MBzP	monobenzyl phthalate	BE	4900	µg/g creatinine	urine	6 and up		based on RfD	US EPA	1993	85-68-7	benzylbutyl phthalate	BzBP	Aylward et al. (2009). Derivation of biomonitoring equivalents for di-n-butyl phthalate (DBP), benzylbutyl phthalate (BzBP), and diethyl phthalate (DEP). Regulatory Toxicology and Pharmacology, 55, 259-267.
Environmental	Phthalates	2528-16-7	MBzP	monobenzyl phthalate	BE	31000	µg/L	urine	6 and up		based on provisional TDI	Health Canada	2000	85-68-7	benzylbutyl phthalate	BzBP	Aylward et al. (2009). Derivation of biomonitoring equivalents for di-n-butyl phthalate (DBP), benzylbutyl phthalate (BzBP), and diethyl phthalate (DEP). Regulatory Toxicology and Pharmacology, 55, 259-267.
Environmental	Phthalates	2528-16-7	MBzP	monobenzyl phthalate	HBM-GV(GenPop)	2000	µg/L	urine	includes children 6 to 13	children	based on LO(A)EL	HBM4EU	2021	85-68-7	butyl benzyl phthalate	BBzP	Lange et al. (2021). HBM4EU_2021_Human BGVs for selected phthalates and a substitute plasticizer
Environmental	Phthalates	2528-16-7	MBzP	monobenzyl phthalate	HBM-GV(GenPop)	3000	µg/L	urine		adults incl. adolescents and women of childbearing age	based on LO(A)EL	HBM4EU	2021	85-68-7	butyl benzyl phthalate	BBzP	Lange et al. (2021). HBM4EU_2021_Human BGVs for selected phthalates and a substitute plasticizer
Environmental	Phthalates	2306-33-4	MEP	monoethyl phthalate	BE	18000	µg/L	urine	6 and up		based on RfD	US EPA	1993	84-66-2	diethyl phthalate	DEP	Aylward et al. (2009). Derivation of biomonitoring equivalents for di-n-butyl phthalate (DBP), benzylbutyl phthalate (BzBP), and diethyl phthalate (DEP). Regulatory Toxicology and Pharmacology, 55, 259-267.
Environmental	Phthalates	2306-33-4	MEP	monoethyl phthalate	BE	23000	µg/g creatinine	urine	6 and up		based on RfD	US EPA	1993	84-66-2	diethyl phthalate	DEP	Aylward et al. (2009). Derivation of biomonitoring equivalents for di-n-butyl phthalate (DBP), benzylbutyl phthalate (BzBP), and diethyl phthalate (DEP). Regulatory Toxicology and Pharmacology, 55, 259-267.
Environmental	Phthalates	OH-MiNP	OH-MiNP (MHNP) ( MHiNP)	monohydroxyisononyl phthalate	BE	1700	µg/L	urine	6 and up		based on provisional TDI	Health Canada	1998	28553-12-0	di-iso-nonyl phthalate	DiNP	Hays et al. (2011). Biomonitoring equivalents for di-isononyl phthalate (DiNP). Regulatory Toxicology and Pharmacology, 60, 181-188.
Environmental	Phthalates	OH-MiNP	OH-MiNP (MHNP) ( MHiNP)	monohydroxyisononyl phthalate	BE	710	µg/L	urine	6 and up		based on ADI	US CPSC	2001	28553-12-0	di-iso-nonyl phthalate	DiNP	Hays et al. (2011). Biomonitoring equivalents for di-isononyl phthalate (DiNP). Regulatory Toxicology and Pharmacology, 60, 181-188.
Environmental	Phthalates	OH-MiNP	OH-MiNP (MHNP) ( MHiNP)	monohydroxyisononyl phthalate	BE	2200	µg/g creatinine	urine	6 and up		based on provisional TDI	Health Canada	1998	28553-12-0	di-iso-nonyl phthalate	DiNP	Hays et al. (2011). Biomonitoring equivalents for di-isononyl phthalate (DiNP). Regulatory Toxicology and Pharmacology, 60, 181-188.
Environmental	Phthalates	OH-MiNP	OH-MiNP (MHNP) ( MHiNP)	monohydroxyisononyl phthalate	BE	910	µg/g creatinine	urine	6 and up		based on ADI	US CPSC	2001	68515-48-0	di-iso-nonyl phthalate	DiNP	Hays et al. (2011). Biomonitoring equivalents for di-isononyl phthalate (DiNP). Regulatory Toxicology and Pharmacology, 60, 181-188.
Environmental	Phthalates	OH-MiNP	OH-MiNP (MHNP) ( MHiNP)	monohydroxyisononyl phthalate	BE	1100	µg/g creatinine	urine	6 and up		based on provisional TDI	EFSA	2005	28553-12-0	di-iso-nonyl phthalate	DiNP	Hays et al. (2011). Biomonitoring equivalents for di-isononyl phthalate (DiNP). Regulatory Toxicology and Pharmacology, 60, 181-188.
Environmental	Phthalates	OH-MiNP	OH-MiNP (MHNP) ( MHiNP)	monohydroxyisononyl phthalate	BE	880	µg/L	urine	6 and up		based on provisional TDI	EFSA	2005	28553-12-0	di-iso-nonyl phthalate	DiNP	Hays et al. (2011). Biomonitoring equivalents for di-isononyl phthalate (DiNP). Regulatory Toxicology and Pharmacology, 60, 181-188.
Environmental	Phthalates	30833-53-5	MiBP	monoisobutyl phthalate	HBM-GV(GenPop)	160	µg/L	urine	includes children 6 to 13	children	based on DNEL	HBM4EU	2021	84-69-5	di-iso-butyl phthalate	DiBP	Lange et al. (2021). HBM4EU_2021_Human BGVs for selected phthalates and a substitute plasticizer
Environmental	Phthalates	30833-53-5	MiBP	monoisobutyl phthalate	HBM-GV(GenPop)	230	µg/L	urine		adults incl. adolescents and women of childbearing age	based on DNEL	HBM4EU	2021	84-69-5	di-iso-butyl phthalate	DiBP	Lange et al. (2021). HBM4EU_2021_Human BGVs for selected phthalates and a substitute plasticizer
Environmental	Phthalates	131-70-4	MnBP	mono-n-butyl phthalate	BE	1400	µg/L	urine	6 and up		based on provisional TDI	Health Canada	1994	84-74-2	di-n-butyl phthalate	DnBP	Aylward et al. (2009). Derivation of biomonitoring equivalents for di-n-butyl phthalate (DBP), benzylbutyl phthalate (BzBP), and diethyl phthalate (DEP). Regulatory Toxicology and Pharmacology, 55, 259-267.
Environmental	Phthalates	131-70-4	MnBP	mono-n-butyl phthalate	BE	200	µg/L	urine	6 and up		based on provisional TDI	EFSA	2005	84-74-2	di-n-butyl phthalate	DnBP	Aylward et al. (2009). Derivation of biomonitoring equivalents for di-n-butyl phthalate (DBP), benzylbutyl phthalate (BzBP), and diethyl phthalate (DEP). Regulatory Toxicology and Pharmacology, 55, 259-267.
Environmental	Phthalates	131-70-4	MnBP	mono-n-butyl phthalate	BE	280	µg/g creatinine	urine	6 and up		based on provisional TDI	EFSA	2005	84-74-2	di-n-butyl phthalate	DnBP	Aylward et al. (2009). Derivation of biomonitoring equivalents for di-n-butyl phthalate (DBP), benzylbutyl phthalate (BzBP), and diethyl phthalate (DEP). Regulatory Toxicology and Pharmacology, 55, 259-267.
Environmental	Phthalates	131-70-4	MnBP	mono-n-butyl phthalate	BE	3500	µg/g creatinine	urine	6 and up		based on RfD	US EPA	1990	84-74-2	di-n-butyl phthalate	DnBP	Aylward et al. (2009). Derivation of biomonitoring equivalents for di-n-butyl phthalate (DBP), benzylbutyl phthalate (BzBP), and diethyl phthalate (DEP). Regulatory Toxicology and Pharmacology, 55, 259-267.
Environmental	Phthalates	131-70-4	MnBP	mono-n-butyl phthalate	BE	2700	µg/L	urine	6 and up		based on RfD	US EPA	1990	84-74-2	di-n-butyl phthalate	DnBP	Aylward et al. (2009). Derivation of biomonitoring equivalents for di-n-butyl phthalate (DBP), benzylbutyl phthalate (BzBP), and diethyl phthalate (DEP). Regulatory Toxicology and Pharmacology, 55, 259-267.
Environmental	Phthalates	131-70-4	MnBP	mono-n-butyl phthalate	BE	1800	µg/g creatinine	urine	6 and up		based on provisional TDI	Health Canada	1994	84-74-2	di-n-butyl phthalate	DnBP	Aylward et al. (2009). Derivation of biomonitoring equivalents for di-n-butyl phthalate (DBP), benzylbutyl phthalate (BzBP), and diethyl phthalate (DEP). Regulatory Toxicology and Pharmacology, 55, 259-267.
Environmental	Phthalates	131-70-4	MnBP	mono-n-butyl phthalate	HBM-GV(GenPop)	120	µg/L	urine	includes children 6 to 13	children	based on DNEL	HBM4EU	2021	84-74-2	di-n-butyl phthalate	DnBP	Lange et al. (2021). HBM4EU_2021_Human BGVs for selected phthalates and a substitute plasticizer
Environmental	Phthalates	131-70-4	MnBP	mono-n-butyl phthalate	HBM-GV(GenPop)	190	µg/L	urine		adults incl. adolescents and women of childbearing age	based on DNEL	HBM4EU	2021	84-74-2	di-n-butyl phthalate	DnBP	Lange et al. (2021). HBM4EU_2021_Human BGVs for selected phthalates and a substitute plasticizer
Environmental	Phthalates	936022-00-3	oxo-MiNP (MONP) (MOiNP)	monooxoisononyl phthalate	BE	470	µg/g creatinine	urine	6 and up		based on ADI	US CPSC	2001	28553-12-0	di-iso-nonyl phthalate	DiNP	Hays et al. (2011). Biomonitoring equivalents for di-isononyl phthalate (DiNP). Regulatory Toxicology and Pharmacology, 60, 181-188.
Environmental	Phthalates	936022-00-3	oxo-MiNP (MONP) (MOiNP)	monooxoisononyl phthalate	BE	900	µg/L	urine	6 and up		based on provisional TDI	Health Canada	1998	28553-12-0	di-iso-nonyl phthalate	DiNP	Hays et al. (2011). Biomonitoring equivalents for di-isononyl phthalate (DiNP). Regulatory Toxicology and Pharmacology, 60, 181-188.
Environmental	Phthalates	936022-00-3	oxo-MiNP (MONP) (MOiNP)	monooxoisononyl phthalate	BE	370	µg/L	urine	6 and up		based on ADI	US CPSC	2001	28553-12-0	di-iso-nonyl phthalate	DiNP	Hays et al. (2011). Biomonitoring equivalents for di-isononyl phthalate (DiNP). Regulatory Toxicology and Pharmacology, 60, 181-188.
Environmental	Phthalates	936022-00-3	oxo-MiNP (MONP) (MOiNP)	monooxoisononyl phthalate	BE	460	µg/L	urine	6 and up		based on provisional TDI	EFSA	2005	28553-12-0	di-iso-nonyl phthalate	DiNP	Hays et al. (2011). Biomonitoring equivalents for di-isononyl phthalate (DiNP). Regulatory Toxicology and Pharmacology, 60, 181-188.
Environmental	Phthalates	936022-00-3	oxo-MiNP (MONP) (MOiNP)	monooxoisononyl phthalate	BE	1200	µg/g creatinine	urine	6 and up		based on provisional TDI	Health Canada	1998	28553-12-0	di-iso-nonyl phthalate	DiNP	Hays et al. (2011). Biomonitoring equivalents for di-isononyl phthalate (DiNP). Regulatory Toxicology and Pharmacology, 60, 181-188.
Environmental	Phthalates	936022-00-3	oxo-MiNP (MONP) (MOiNP)	monooxoisononyl phthalate	BE	590	µg/g creatinine	urine	6 and up		based on provisional TDI	EFSA	2005	28553-12-0	di-iso-nonyl phthalate	DiNP	Hays et al. (2011). Biomonitoring equivalents for di-isononyl phthalate (DiNP). Regulatory Toxicology and Pharmacology, 60, 181-188.
Environmental	Phthalates	oxo-MPHP	oxo-MPHP	oxo-mono(propylheptyl) phthalate	HBM-GV(GenPop)	190	µg/L	urine	includes children 6 to 13	children	Based on RfD	HBM4EU	2021	53306-54-0	di-(2-propylheptyl) phthalate	DPHP	Lange et al. (2021). HBM4EU_2021_Human BGVs for selected phthalates and a substitute plasticizer
Environmental	Phthalates	oxo-MPHP	oxo-MPHP	oxo-mono(propylheptyl) phthalate	HBM-GV(GenPop)	290	µg/L	urine		adults incl. adolescents and women of childbearing age	Based on RfD	HBM4EU	2021	53306-54-0	di-(2-propylheptyl) phthalate	DPHP	Lange et al. (2021). HBM4EU_2021_Human BGVs for selected phthalates and a substitute plasticizer
